# Supplementary material for: Revealing the Impact of Pre-training Data on Medical Foundation Models
Source: Research Square preprint supplement (doi:10.21203/rs.3.rs-6080254/v1), 2025-04-03
Supplement: Supplementary file 1 [file c8c55516a8eca836c807d0a8.xlsx]

## Sheet: Supplementary Table 1
Dataset name	Country	Imaging devices	Sub-category	Train	Validation	Test	In total(%)
Indian Diabetic Retinopathy Image Dataset (IDRID)	India	VX-10 alpha digital fundus camera (Kowa)	No retinopathy:	107	27	34	168(32.56%)
			Mild retinopathy:	16	4	5	25(4.84%)
			Moderate retinopathy:	108	28	32	168(32.56%)
			Severe retinopathy:	59	15	19	93(18.02%)
			Proliferative retinopathy:	39	10	13	62(12.02)
			in total:	329	84	103	516
MESSIDOR2	France	TRC-NW6 non-mydriatic fundus camera (Topcon)	No retinopathy:	568	143	306	1017(58.31%)
			Mild retinopathy:	151	38	81	270(15.48%)
			Moderate retinopathy:	193	49	105	347(19.89%)
			Severe retinopathy:	41	11	23	75(4.3%)
			Proliferative retinopathy:	19	5	11	35(2.01%)
			in total:	972	246	526	1744
Asia Pacific TeleOphthalmology Society 2019 (APTOS2019)	India	a variety of camera models, not specified	No retinopathy:	1010	253	542	1805(49.29%)
			Mild retinopathy:	207	52	111	370(10.1%)
			Moderate retinopathy:	559	140	300	999(27.28%)
			Severe retinopathy:	108	27	58	193(5.27%)
			Proliferative retinopathy:	164	42	89	295(8.06%)
			in total:	2048	514	1100	3662
Glaucoma Fundus	South Korea	AFC-330 non-mydriatic auto fundus camera (Nidek)	No glaucoma:	440	111	237	788(51.04%)
			Early glaucoma:	161	41	87	289(18.72%)
			Advanced glaucoma:	260	66	141	467(30.25%)
			in total:	861	218	465	1544
Joint Shantou International Eye Centre (JSIEC)	China	FF450 Plus IR Fundus Camera (ZEISS) and TRC-50DX Mydriatic Retinal Camera (Topcon)	Normal:	20	6	12	38(3.8%)
			Tessellated fundus:	7	2	4	13(1.3%)
			Large optic cup:	28	7	15	50(5%)
			Non-referable DR:	9	3	6	18(1.8%)
			Moderate nonproliferative DR:	27	7	15	49(4.9%)
			Severe and proliferative DR:	21	6	12	39(3.9%)
			Possible glaucoma:	7	2	4	13(1.3%)
			Optic atrophy:	6	2	4	12(1.2%)
			Severe hypertensive retinopathy:	8	2	5	15(1.5%)
			Disc swelling and elevation:	7	2	4	13(1.3%)
			Dragged Disc:	5	2	3	10(1%)
			Congenital disc abnormality:	5	2	3	10(1%)
			Retinitis pigmentosa:	12	3	7	22(2.2%)
			Bietti crystalline dystrophy:	4	1	3	8(0.8%)
			Peripheral retinal degeneration and break:	7	2	5	14(1.4%)
			Myelinated nerve fiber:	5	2	4	11(1.1%)
			Vitreous particles:	7	2	5	14(1.4%)
			Fundus neoplasm:	4	1	3	8(0.8%)
			Branch Retinal Vein Occlusion:	24	6	14	44(4.4%)
			Central retinal vein occlusion:	12	3	7	22(2.2%)
			Massive hard exudates:	7	2	4	13(1.3%)
			Yellow-white spots-flecks:	16	4	9	29(2.9%)
			Cotton-wool spots:	5	2	3	10(1%)
			Vessel tortuosity:	7	2	5	14(1.4%)
			Chorioretinal atrophy-coloboma:	8	2	5	15(1.5%)
			Preretinal hemorrhage:	5	2	3	10(1%)
			Fibrosis:	5	2	3	10(1%)
			Laser Spots:	11	3	6	20(2%)
			Silicon oil in eye:	10	3	6	19(1.9%)
			Blur fundus without PDR:	63	16	35	114(11.4%)
			Blur fundus with suspected PDR:	24	7	14	45(4.5%)
			Retinal artery occlusion:	8	3	5	16(1.6%)
			Rhegmatogenous retinal detachment:	31	8	18	57(5.7%)
			Central serous chorioretinopathy:	7	2	5	14(1.4%)
			Vogt-Koyanagi-Harada disease:	7	2	5	14(1.4%)
			Maculopathy:	40	11	23	74(7.4%)
			Epiretinal membrane:	14	4	8	26(2.6%)
			Macular hole:	12	4	7	23(2.3%)
			Pathological myopia:	29	8	17	54(5.4%)
			In total:	534	150	316	1000
Retina	NR	NR	Normal:	168	42	90	300(49.92%)
			Cataract:	56	14	30	100(16.64%)
			Glaucoma:	56	14	31	101(16.81%)
			Other retinal diseases:	56	14	30	100(16.64%)
			In total:	336	84	181	601

## Sheet: Supplementary Table 2
Study cohort	Imaging device	Category	Number of individuals	Number of eyes	Age - mean (SD)	Gender - Female (%)	Ethnicity
Diabetic retinopathy detection
MEH	TOPCON 3DOCT-2000SA	No retinopathy:	400	400	66.9 (13.6)	204 (51.0%)	White (15.1%); Asian or Asian British (29.2%); Black or Black British (8.8%); Others (19.9%); Unknown (27.1%)
		Mild retinopathy:	400	400	61.7 (13.9)	174 (56.5%)	White (14.3%); Asian or Asian British (29.0%); Black or Black British (10.0%); Others (20.0%); Unknown (26.8%)
		Moderate retinopathy:	400	400	59.8 (12.5)	144 (36.1%)	White (15.3%); Asian or Asian British (30.1%); Black or Black British (6.8%); Others (19.8%); Unknown (28.1%)
		Severe retinopathy:	400	400	56.6 (12.5)	130 (32.5%)	White (11.5%); Asian or Asian British (35.5%); Black or Black British (6.5%); Others (18.5%); Unknown (28.0%)
		Proliferative retinopathy:	400	400	52.8 (13.7)	148 (37.0%)	White (21.5%); Asian or Asian British (24.5%); Black or Black British (8.0%); Others (20.8%); Unknown (25.3%)
Shanghai	TRC-NW300, TRC-NW400	No retinopathy:	400	400	56.7 (14.9)	166 (41.5%)	Chinese (100%)
		Mild retinopathy:	400	400	55.4 (14.2)	158 (39.5%)	Chinese (100%)
		Moderate retinopathy:	400	400	58.8 (11.6)	133 (33.3%)	Chinese (100%)
		Severe retinopathy:	400	400	53.3 (10.9)	136 (34.0%)	Chinese (100%)
		Proliferative retinopathy:	400	400	58.8 (13.0)	127 (31.8%)	Chinese (100%)
Diabetic macular oedema detection
MEH	TOPCON 3DOCT-2000SA	No diabetic oedema	1379	1379	60.0 (14.7)	572 (41.5%)	White (14.9%); Asian or Asian British (30.5%); Black or Black British (7.4%); Others (19.8%); Unknown (27.4%)
		non-clinically significant diabetic macular oedema	340	340	58.3 (13.1)	128 (37.6%)	White (16.8%); Asian or Asian British (25.9%); Black or Black British (8.5%); Others (17.9%); Unknown (30.9%)
		clinically significant diabetic oedema	281	281	58.8 (12.0)	100 (35.6%)	White (17.1%); Asian or Asian British (29.9%); Black or Black British (10.3%); Others (22.1%); Unknown (20.6%)
Shanghai	TRC-NW300, TRC-NW400	No diabetic oedema	669	669	57.4 (13.3)	267(39.91%)	Chinese (100%)
		non-clinically significant diabetic macular oedema	602	602	56.8 (11.6)	257(42.7%)	Chinese (100%)
		clinically significant diabetic oedema	669	669	58.3 (11.3)	217(32.4%)	Chinese (100%)
3-year incidence prediction of ischaemic stroke
MEH	TOPCON 3DOCT-2000SA	Stroke group	1263	1263	75.8 (11.6)	671 (53.1%)	White (41.9%); Asian or Asian British (20.3%); Black or Black British (10.4%); Others (11.9%); Unknown (14.5%)
		Control group	1263	1263	66.7 (13.7)	653 (51.7%)	White (37.1%); Asian or Asian British (16.2%); Black or Black British (9.7%); Others (16.2%); Unknown (20.8%)
Shanghai	TRC-NW300, TRC-NW400	Stroke group	1000	1000	65.9 (10.9)	315 (31.5%)	Chinese (100%)
		Control group	1000	1000	51.9 (8.7)	246 (24.6%)	Chinese (100%)

## Sheet: Supplementary Table 3
Metric	AUROC						AUPRC
Self-supervised learning strategy	Masked Autoencoder			DINOv2			Masked Autoencoder			DINOv2
Shanghai data - Finetune	FM-Shanghai	FM-MEH	p-value*	FM-Shanghai	FM-MEH	p-value	FM-Shanghai	FM-MEH	p-value	FM-Shanghai	FM-MEH	p-value
Diabetic retinopathy	0.979 (0.976, 0.982)*	0.973 (0.969, 0.976)	0.003	0.988 (0.984, 0.992)	0.988 (0.984, 0.991)	0.807	0.934 (0.92, 0.947)	0.916 (0.898, 0.935)	0.073	0.965 (0.956, 0.974)	0.966 (0.956, 0.975)	0.86
Diabetic oedema	0.973 (0.966, 0.981)	0.959 (0.951, 0.967)	0.006	0.984 (0.979, 0.988)	0.988 (0.986, 0.99)	0.067	0.945 (0.929, 0.962)	0.918 (0.902, 0.935)	0.013	0.967 (0.956, 0.978)	0.974 (0.971, 0.977)	0.132
Ischaemic stroke	0.912 (0.905, 0.918)	0.867 (0.843, 0.892)	0.013	0.976 (0.972, 0.98)	0.98 (0.972, 0.988)	0.262	0.915 (0.899, 0.931)	0.871 (0.838, 0.904)	0.01	0.972 (0.969, 0.976)	0.977 (0.967, 0.987)	0.252
Shanghai data - Linear probe
Diabetic retinopathy	0.944 (0.937, 0.951)	0.938 (0.931, 0.944)	0.111	0.948 (0.936, 0.961)	0.949 (0.946, 0.953)	0.85	0.848 (0.827, 0.869)	0.828 (0.812, 0.845)	0.079	0.863 (0.837, 0.888)	0.856 (0.846, 0.866)	0.524
Diabetic oedema	0.874 (0.864, 0.885)	0.865 (0.858, 0.873)	0.087	0.932 (0.927, 0.936)	0.93 (0.91, 0.95)	0.773	0.782 (0.764, 0.8)	0.767 (0.757, 0.778)	0.085	0.874 (0.865, 0.883)	0.865 (0.824, 0.906)	0.558
Ischaemic stroke	0.835 (0.804, 0.866)	0.827 (0.796, 0.858)	0.632	0.866 (0.839, 0.893)	0.859 (0.842, 0.876)	0.585	0.826 (0.783, 0.869)	0.821 (0.782, 0.859)	0.816	0.863 (0.833, 0.892)	0.85 (0.829, 0.87)	0.348
MEH data - Finetune
Diabetic retinopathy	0.78 (0.775, 0.785)	0.782 (0.779, 0.785)	0.275	0.788 (0.778, 0.798)	0.807 (0.777, 0.837)	0.1	0.465 (0.455, 0.475)	0.478 (0.47, 0.486)	0.022	0.449 (0.43, 0.467)	0.505 (0.474, 0.537)	0.003
Diabetic oedema	0.739 (0.724, 0.753)	0.73 (0.709, 0.751)	0.313	0.725 (0.69, 0.76)	0.76 (0.729, 0.79)	0.055	0.503 (0.492, 0.514)	0.508 (0.484, 0.532)	0.567	0.492 (0.443, 0.541)	0.543 (0.52, 0.565)	0.025
Ischaemic stroke	0.73 (0.721, 0.74)	0.753 (0.743, 0.762)	0.002	0.702 (0.68, 0.723)	0.721 (0.696, 0.746)	0.138	0.72 (0.709, 0.731)	0.745 (0.734, 0.757)	0.002	0.69 (0.666, 0.714)	0.705 (0.67, 0.74)	0.351
MEH data - Linear probe
Diabetic retinopathy	0.647 (0.635, 0.66)	0.671 (0.658, 0.683)	0.007	0.715 (0.712, 0.719)	0.722 (0.714, 0.731)	0.052	0.319 (0.313, 0.325)	0.347 (0.333, 0.36)	<0.001	0.374 (0.365, 0.383)	0.394 (0.384, 0.405)	0.003
Diabetic oedema	0.666 (0.656, 0.676)	0.674 (0.649, 0.7)	0.361	0.696 (0.691, 0.701)	0.693 (0.682, 0.704)	0.557	0.449 (0.442, 0.456)	0.466 (0.44, 0.493)	0.092	0.48 (0.469, 0.491)	0.5 (0.492, 0.507)	0.003
Ischaemic stroke	0.703 (0.696, 0.711)	0.745 (0.734, 0.756)	<0.001	0.681 (0.674, 0.688)	0.708 (0.702, 0.713)	<0.001	0.694 (0.688, 0.7)	0.74 (0.73, 0.749)	<0.001	0.672 (0.665, 0.679)	0.703 (0.695, 0.71)	<0.001
Public datasets - Finetune
APTOS2019	0.95 (0.95, 0.951)	0.947 (0.945, 0.948)	<0.001	0.943 (0.935, 0.951)	0.949 (0.944, 0.955)	0.123	0.736 (0.731, 0.741)	0.735 (0.726, 0.745)	0.843	0.711 (0.692, 0.731)	0.732 (0.713, 0.757)	0.057
IDRiD	0.826 (0.816, 0.836)	0.823 (0.810, 0.836)	0.601	0.804 (0.782, 0.826)	0.82 (0.798, 0.841)	0.187	0.493 (0.477, 0.51)	0.495 (0.470, 0.520)	0.874	0.513 (0.477, 0.548)	0.527 (0.505, 0.549)	0.365
MESSIDOR2	0.892 (0.889, 0.894)	0.863 (0.859, 0.867)	<0.001	0.894 (0.884, 0.904)	0.917 (0.91, 0.923)	<0.001	0.677 (0.665, 0.689)	0.617 (0.608, 0.627)	<0.001	0.673 (0.646, 0.7)	0.72 (0.704, 0.737)	0.003
Glaucoma fundus	0.939 (0.938, 0.94)	0.933 (0.930, 0.937)	0.002	0.95 (0.946, 0.955)	0.946 (0.941, 0.95)	0.069	0.856 (0.851, 0.861)	0.840 (0.833, 0.846)	<0.001	0.873 (0.856, 0.89)	0.87 (0.854, 0.886)	0.746
JSIEC	0.993 (0.992, 0.994)	0.994 (0.993, 0.995)	0.129	0.995 (0.993, 0.997)	0.995 (0.994, 0.996)	0.851	0.913 (0.905, 0.921)	0.888 (0.878, 0.898)	<0.001	0.946 (0.935, 0.958)	0.949 (0.936, 0.963)	0.651
Retina	0.89 (0.886, 0.894)	0.830 (0.811, 0.849)	<0.001	0.86 (0.832, 0.888)	0.868 (0.855, 0.881)	0.466	0.758 (0.752, 0.764)	0.651 (0.618, 0.684)	<0.001	0.718 (0.688, 0.749)	0.733 (0.698, 0.768)	0.408
Public datasets - Linear probe
APTOS2019	0.91 (0.908, 0.913)	0.908 (0.904, 0.912)	0.171	0.923 (0.921, 0.924)	0.921 (0.918, 0.924)	0.18	0.616 (0.604, 0.628)	0.619 (0.607, 0.630)	0.613	0.641 (0.637, 0.644)	0.647 (0.639, 0.655)	0.069
IDRiD	0.713 (0.676, 0.751)	0.735 (0.722, 0.748)	0.172	0.71 (0.699, 0.72)	0.773 (0.763, 0.783)	<0.001	0.413 (0.376, 0.45)	0.417 (0.409, 0.426)	0.767	0.424 (0.412, 0.436)	0.47 (0.457, 0.483)	<0.001
MESSIDOR2	0.81 (0.8, 0.82)	0.808 (0.801, 0.815)	0.738	0.833 (0.826, 0.841)	0.844 (0.838, 0.849)	0.056	0.459 (0.438, 0.48)	0.460 (0.442, 0.477)	0.912	0.522 (0.505, 0.54)	0.516 (0.498, 0.535)	0.621
Glaucoma fundus	0.868 (0.864, 0.873)	0.893 (0.890, 0.896)	<0.001	0.9 (0.898, 0.902)	0.902 (0.898, 0.906)	0.168	0.733 (0.727, 0.74)	0.757 (0.751, 0.762)	<0.001	0.765 (0.76, 0.77)	0.784 (0.778, 0.789)	<0.001
JSIEC	0.946 (0.944, 0.948)	0.950 (0.945, 0.954)	0.097	0.988 (0.988, 0.988)	0.988 (0.986, 0.989)	0.703	0.557 (0.53, 0.583)	0.620 (0.604, 0.637)	<0.001	0.888 (0.884, 0.891)	0.887 (0.882, 0.891)	0.693
Retina	0.741 (0.719, 0.763)	0.734 (0.724, 0.744)	0.465	0.77 (0.764, 0.775)	0.78 (0.776, 0.784)	0.013	0.531 (0.505, 0.557)	0.526 (0.521, 0.530)	0.603	0.586 (0.577, 0.595)	0.593 (0.588, 0.598)	0.266
*Parentheses include values of 95% confidence interval.
*p-value comparing FM-Shanghai and FM-MEH
Bold cell highlighting significantly better performance (p<0.05)

## Sheet: Supplementary Table 4
			Performance gap = AUROC (FM-MEH) - AUROC (FM-Shanghai)*
			Masked Autoencoder				DINOV2
Downstream tasks	Characteristics	Subgroups	Finetune	p-value	Linear probe	p-value	Finetune	p-value	Linear probe	p-value
Diabetic retinopathy detection	Age	Young group (<40 years)	-0.07	0.007	-0.048	0.022	-0.038	0.025	-0.076	<0.001
		Middle-aged group (40-70 years)	0.008	0.102	0.019	0.119	0.021	0.084	-0.004	0.28
		Aged group (>70 years)	0.031	0.018	0.057	0.026	0.039	0.006	0.04	<0.001
	Sex	Female	0.001	0.536	0.035	0.034	0.019	0.091	0.015	0.019
		Male	0.006	0.264	0.018	0.108	0.02	0.146	-0.003	0.536
	Ethnicity	White	0.005	0.485	0.031	0.054	0.054	0.037	0.02	0.044
		Asian or Asian British	0.013	0.249	0.026	0.01	0.012	0.443	0.042	<0.001
		Black or Black British	-0.025	0.076	0.067	0.032	0.023	0.421	-0.039	0.002
Diabetic macular oedema detection	Age	Young group (<40 years)	-0.144	0.002	-0.094	0.014	-0.044	0.034	-0.279	<0.001
		Middle-aged group (40-70 years)	0.002	0.898	0.004	0.708	-0.007	0.859	-0.011	0.557
		Aged group (>70 years)	0.047	0.024	0.049	0.034	0.055	0.009	0.041	0.027
	Sex	Female	0.003	0.871	0.002	0.892	0.03	0.254	-0.015	0.004
		Male	-0.013	0.197	0.009	0.558	0.039	0.012	-0.004	0.398
	Ethnicity	White	-0.014	0.558	0.033	0.075	0.039	0.059	-0.12	<0.001
		Asian or Asian British	0.003	0.698	0.008	0.793	0.028	0.167	0.046	0.009
		Black or Black British	-0.012	0.656	-0.006	0.529	0.023	0.448	0.003	0.682
* The table shows the mean performance difference and the p-value between results with five random seeds
The main purpose of this table is to find consistent patterns from the performance gap across subgroups

## Sheet: Supplementary Table 5
Metric	AUROC						AUPRC
Self-supervised learning strategy	FM-Shanghai			FM-MEH			FM-Shanghai			FM-MEH
Shanghai data - Finetune	Masked Autoencoder	DINOv2	p-value*	Masked Autoencoder	DINOv2	p-value	Masked Autoencoder	DINOv2	p-value	Masked Autoencoder	DINOv2	p-value
Diabetic retinopathy	0.979 (0.976, 0.982)	0.988 (0.984, 0.992)	0.001	0.973 (0.969, 0.976)	0.988 (0.984, 0.991)	<0.001	0.934 (0.92, 0.947)	0.965 (0.956, 0.974)	<0.001	0.916 (0.898, 0.935)	0.966 (0.956, 0.975)	<0.001
Diabetic oedema	0.973 (0.966, 0.981)	0.984 (0.979, 0.988)	0.01	0.959 (0.951, 0.967)	0.988 (0.986, 0.99)	<0.001	0.945 (0.929, 0.962)	0.967 (0.956, 0.978)	0.016	0.918 (0.902, 0.935)	0.974 (0.971, 0.977)	<0.001
Ischaemic stroke	0.912 (0.905, 0.918)	0.976 (0.972, 0.98)	<0.001	0.867 (0.843, 0.892)	0.98 (0.972, 0.988)	<0.001	0.915 (0.899, 0.931)	0.972 (0.969, 0.976)	<0.001	0.871 (0.838, 0.904)	0.977 (0.967, 0.987)	<0.001
Shanghai data - Linear probe
Diabetic retinopathy	0.944 (0.937, 0.951)	0.948 (0.936, 0.961)	0.406	0.938 (0.931, 0.944)	0.949 (0.946, 0.953)	0.003	0.848 (0.827, 0.869)	0.863 (0.837, 0.888)	0.255	0.828 (0.812, 0.845)	0.856 (0.846, 0.866)	0.004
Diabetic oedema	0.874 (0.864, 0.885)	0.932 (0.927, 0.936)	<0.001	0.865 (0.858, 0.873)	0.93 (0.91, 0.95)	<0.001	0.782 (0.764, 0.8)	0.874 (0.865, 0.883)	<0.001	0.767 (0.757, 0.778)	0.865 (0.824, 0.906)	<0.001
Ischaemic stroke	0.835 (0.804, 0.866)	0.866 (0.839, 0.893)	0.073	0.827 (0.796, 0.858)	0.859 (0.842, 0.876)	0.036	0.826 (0.783, 0.869)	0.863 (0.833, 0.892)	0.085	0.821 (0.782, 0.859)	0.85 (0.829, 0.87)	0.099
MEH data - Finetune
Diabetic retinopathy	0.78 (0.775, 0.785)	0.788 (0.778, 0.798)	0.043	0.782 (0.779, 0.785)	0.807 (0.777, 0.837)	0.02	0.465 (0.455, 0.475)	0.449 (0.43, 0.467)	0.038	0.478 (0.47, 0.486)	0.505 (0.474, 0.537)	0.023
Diabetic oedema	0.739 (0.724, 0.753)	0.725 (0.69, 0.76)	0.294	0.73 (0.709, 0.751)	0.76 (0.729, 0.79)	0.042	0.503 (0.492, 0.514)	0.492 (0.443, 0.541)	0.51	0.508 (0.484, 0.532)	0.543 (0.52, 0.565)	0.016
Ischaemic stroke	0.73 (0.721, 0.74)	0.702 (0.68, 0.723)	0.017	0.753 (0.743, 0.762)	0.721 (0.696, 0.746)	0.021	0.72 (0.709, 0.731)	0.69 (0.666, 0.714)	0.02	0.745 (0.734, 0.757)	0.705 (0.67, 0.74)	0.028
MEH data - Linear probe
Diabetic retinopathy	0.647 (0.635, 0.66)	0.715 (0.712, 0.719)	<0.001	0.671 (0.658, 0.683)	0.722 (0.714, 0.731)	<0.001	0.319 (0.313, 0.325)	0.374 (0.365, 0.383)	<0.001	0.347 (0.333, 0.36)	0.394 (0.384, 0.405)	<0.001
Diabetic oedema	0.666 (0.656, 0.676)	0.696 (0.691, 0.701)	<0.001	0.674 (0.649, 0.7)	0.693 (0.682, 0.704)	0.076	0.449 (0.442, 0.456)	0.48 (0.469, 0.491)	<0.001	0.466 (0.44, 0.493)	0.5 (0.492, 0.507)	0.008
Ischaemic stroke	0.703 (0.696, 0.711)	0.681 (0.674, 0.688)	<0.001	0.745 (0.734, 0.756)	0.708 (0.702, 0.713)	<0.001	0.694 (0.688, 0.7)	0.672 (0.665, 0.679)	<0.001	0.74 (0.73, 0.749)	0.703 (0.695, 0.71)	<0.001
Public datasets - Finetune
APTOS2019	0.95 (0.95, 0.951)	0.943 (0.935, 0.951)	0.043	0.947 (0.945, 0.948)	0.949 (0.944, 0.955)	0.232	0.736 (0.731, 0.741)	0.711 (0.692, 0.731)	0.009	0.735 (0.726, 0.745)	0.732 (0.713, 0.757)	0.97
IDRiD	0.826 (0.816, 0.836)	0.804 (0.782, 0.826)	0.031	0.823 (0.810, 0.836)	0.82 (0.798, 0.841)	0.722	0.493 (0.477, 0.51)	0.513 (0.477, 0.548)	0.206	0.495 (0.470, 0.520)	0.527 (0.505, 0.549)	0.029
MESSIDOR2	0.892 (0.889, 0.894)	0.894 (0.884, 0.904)	0.606	0.863 (0.859, 0.867)	0.917 (0.91, 0.923)	<0.001	0.677 (0.665, 0.689)	0.673 (0.646, 0.7)	0.669	0.617 (0.608, 0.627)	0.72 (0.704, 0.737)	<0.001
Glaucoma fundus	0.939 (0.938, 0.94)	0.95 (0.946, 0.955)	<0.001	0.933 (0.930, 0.937)	0.946 (0.941, 0.95)	<0.001	0.856 (0.851, 0.861)	0.873 (0.856, 0.89)	0.025	0.840 (0.833, 0.846)	0.87 (0.854, 0.886)	<0.001
JSIEC	0.993 (0.992, 0.994)	0.995 (0.993, 0.997)	0.249	0.994 (0.993, 0.995)	0.995 (0.994, 0.996)	0.062	0.913 (0.905, 0.921)	0.946 (0.935, 0.958)	0.092	0.888 (0.878, 0.898)	0.949 (0.936, 0.963)	<0.001
Retina	0.89 (0.886, 0.894)	0.86 (0.832, 0.888)	0.018	0.830 (0.811, 0.849)	0.868 (0.855, 0.881)	0.002	0.758 (0.752, 0.764)	0.718 (0.688, 0.749)	0.007	0.651 (0.618, 0.684)	0.733 (0.698, 0.768)	0.002
Public datasets - Linear probe
APTOS2019	0.91 (0.908, 0.913)	0.923 (0.921, 0.924)	<0.001	0.908 (0.904, 0.912)	0.921 (0.918, 0.924)	<0.001	0.616 (0.604, 0.628)	0.641 (0.637, 0.644)	<0.001	0.619 (0.607, 0.630)	0.647 (0.639, 0.655)	<0.001
IDRiD	0.713 (0.676, 0.751)	0.71 (0.699, 0.72)	0.749	0.735 (0.722, 0.748)	0.773 (0.763, 0.783)	<0.001	0.413 (0.376, 0.45)	0.424 (0.412, 0.436)	0.366	0.417 (0.409, 0.426)	0.47 (0.457, 0.483)	<0.001
MESSIDOR2	0.81 (0.8, 0.82)	0.833 (0.826, 0.841)	<0.001	0.808 (0.801, 0.815)	0.844 (0.838, 0.849)	<0.001	0.459 (0.438, 0.48)	0.522 (0.505, 0.54)	<0.001	0.460 (0.442, 0.477)	0.516 (0.498, 0.535)	<0.001
Glaucoma fundus	0.868 (0.864, 0.873)	0.9 (0.898, 0.902)	<0.001	0.893 (0.890, 0.896)	0.902 (0.898, 0.906)	<0.001	0.733 (0.727, 0.74)	0.765 (0.76, 0.77)	<0.001	0.757 (0.751, 0.762)	0.784 (0.778, 0.789)	<0.001
JSIEC	0.946 (0.944, 0.948)	0.988 (0.988, 0.988)	<0.001	0.950 (0.945, 0.954)	0.988 (0.986, 0.989)	<0.001	0.557 (0.53, 0.583)	0.888 (0.884, 0.891)	<0.001	0.620 (0.604, 0.637)	0.887 (0.882, 0.891)	<0.001
Retina	0.741 (0.719, 0.763)	0.77 (0.764, 0.775)	<0.001	0.734 (0.724, 0.744)	0.78 (0.776, 0.784)	<0.001	0.531 (0.505, 0.557)	0.586 (0.577, 0.595)	<0.001	0.526 (0.521, 0.530)	0.593 (0.588, 0.598)	<0.001
*p-value comparing Masked Autoencoder and DINOV2
Bold cell highlighting significantly better performance (p<0.05)
